# Supplementary material
Source: Research Square preprint supplement (doi:10.21203/rs.3.rs-9121813/v1)
Supplement: Supplementary file 1 [file 0713d277fd065e0d8518bf3a.docx]

**Supplementary Table 1:** Results of the QSAR model.

| S.D. | R^2 | RMSE | Q^2 |
| --- | --- | --- | --- |
| 0.7956 | 0.5538 | 0.8670 | 0.4578 |

**Supplementary Table 2:** Test and Train Dataset for the QSAR model.

| ID Set Y(Obs) Y(Pred) Error Name |
| --- |
| 1 train 5.4800 5.9647 0.4847 CHEMBL223655 |
| 2 train 5.5900 5.9647 0.3747 CHEMBL387879 |
| 3 train 5.7300 6.6724 0.9424 CHEMBL388625 |
| 4 train 7.2200 7.0286 -0.1914 CHEMBL118 |
| 5 test 6.1600 5.8790 -0.2810 CHEMBL440001 |
| 6 train 4.4400 4.4865 0.0465 CHEMBL105350 |
| 7 train 5.0100 4.8757 -0.1343 CHEMBL180239 |
| 8 train 4.9700 4.8757 -0.0943 CHEMBL181529 |
| 9 test 6.7500 6.4906 -0.2594 CHEMBL270730 |
| 10 train 6.1100 5.8902 -0.2198 CHEMBL4091890 |
| 11 train 4.9300 6.2903 1.3603 CHEMBL1221678 |
| 12 train 7.7000 5.7715 -1.9285 CHEMBL4071983 |
| 13 train 6.1100 6.3117 0.2017 CHEMBL72515 |
| 14 train 7.9200 6.4613 -1.4587 CHEMBL358609 |
| 15 test 8.9200 7.2423 -1.6777 CHEMBL270078 |
| 16 train 5.4000 6.3297 0.9297 CHEMBL271572 |
| 17 test 7.0600 7.2508 0.1908 CHEMBL96947 |
| 18 train 7.0000 6.0682 -0.9318 CHEMBL92793 |
| 19 train 6.6000 6.7145 0.1145 CHEMBL364966 |
| 20 train 6.3000 6.9689 0.6689 CHEMBL122 |
| 21 train 6.5700 6.4350 -0.1350 CHEMBL281847 |
| 22 train 6.9600 6.4350 -0.5250 CHEMBL285828 |
| 23 test 5.9000 6.1871 0.2871 CHEMBL1221730 |
| 24 train 6.5200 5.5684 -0.9516 CHEMBL146703 |
| 25 train 5.1600 6.1665 1.0065 CHEMBL3127307 |
| 26 train 4.9500 5.2372 0.2872 CHEMBL3289925 |
| 27 train 4.7300 5.3244 0.5944 CHEMBL3309947 |
| 28 test 4.3300 4.9676 0.6376 CHEMBL3290193 |
| 29 train 5.0900 6.0500 0.9600 CHEMBL3322400 |
| 30 train 5.5400 5.7702 0.2302 CHEMBL3322412 |
| 31 train 5.6000 6.3339 0.7339 CHEMBL3322415 |
| 32 train 6.7200 7.0231 0.3031 CHEMBL126991 |
| 33 train 8.9000 7.0495 -1.8505 CHEMBL93372 |
| 34 train 5.2300 5.8790 0.6490 CHEMBL157720 |
| 35 test 6.2800 6.5149 0.2349 CHEMBL1630223 |
| 36 train 4.0200 6.7091 2.6891 CHEMBL1630245 |
| 37 train 6.8200 6.7262 -0.0938 CHEMBL1630226 |
| 38 test 7.0300 6.7091 -0.3209 CHEMBL1630228 |
| 39 train 7.0000 6.9660 -0.0340 CHEMBL278505 |
| 40 train 4.9600 5.8014 0.8414 CHEMBL212918 |
| 41 test 6.4300 6.2102 -0.2198 CHEMBL434520 |
| 42 train 5.8300 6.1572 0.3272 CHEMBL361504 |
| 43 test 7.8200 6.6210 -1.1990 CHEMBL56367 |
| 44 train 4.2900 5.8125 1.5225 CHEMBL326005 |
| 45 train 5.3800 5.7583 0.3783 CHEMBL419561 |
| 46 train 6.1600 6.6197 0.4597 CHEMBL375309 |
| 47 test 4.3100 6.1132 1.8032 CHEMBL101459 |
| 48 train 6.5100 6.8555 0.3455 CHEMBL274473 |
| 49 train 6.3600 6.0296 -0.3304 CHEMBL108452 |
| 50 test 8.1000 7.4762 -0.6238 CHEMBL117295 |
| 51 train 5.7400 6.0641 0.3241 CHEMBL321407 |
| 52 train 6.4600 6.4172 -0.0428 CHEMBL44468 |
| 53 train 7.1000 7.3267 0.2267 CHEMBL295032 |
| 54 train 7.2400 6.6261 -0.6139 CHEMBL17069 |
| 55 test 5.8900 5.8571 -0.0329 CHEMBL154422 |
| 56 train 6.0000 7.0286 1.0286 CHEMBL118 |
| 57 train 7.6200 6.2485 -1.3715 CHEMBL185621 |
| 58 train 5.7000 5.6869 -0.0131 CHEMBL307233 |
| 59 train 7.3800 7.1966 -0.1834 CHEMBL117306 |
| 60 train 6.6200 6.4199 -0.2001 CHEMBL46761 |
| 61 train 8.7000 8.6192 -0.0808 CHEMBL52020 |
| 62 test 6.1000 6.1800 0.0800 CHEMBL44466 |
| 63 train 7.6600 7.8841 0.2241 CHEMBL314297 |
| 64 train 6.7000 5.5205 -1.1795 CHEMBL155781 |
| 65 train 6.1600 6.4283 0.2683 CHEMBL154253 |
| 66 train 7.4000 6.3770 -1.0230 CHEMBL316866 |
| 67 test 6.8500 6.4452 -0.4048 CHEMBL327751 |
| 68 train 6.7000 6.3632 -0.3368 CHEMBL275376 |
| 69 train 6.3900 5.6246 -0.7654 CHEMBL158148 |
| 70 train 7.8900 6.8453 -1.0447 CHEMBL43461 |
| 71 test 7.2500 7.0286 -0.2214 CHEMBL118 |
| 72 train 4.4700 5.1337 0.6637 CHEMBL1275971 |
| 73 train 6.4800 5.2812 -1.1988 CHEMBL4454251 |
| 74 train 4.9600 5.8713 0.9113 CHEMBL16814 |
| 75 train 7.0300 6.7904 -0.2396 CHEMBL312221 |
| 76 test 6.4700 6.5112 0.0412 CHEMBL282084 |
| 77 train 7.2900 6.4543 -0.8357 CHEMBL117146 |
| 78 train 8.0300 7.7442 -0.2858 CHEMBL29887 |
| 79 train 4.7700 6.2304 1.4604 CHEMBL6 |
| 80 test 4.8200 5.5469 0.7269 CHEMBL3410346 |
| 81 train 4.7400 5.8825 1.1425 CHEMBL3410352 |
| 82 train 4.7900 5.6330 0.8430 CHEMBL3410364 |
| 83 train 6.7200 6.3419 -0.3781 CHEMBL4071061 |
| 84 train 6.2500 5.8902 -0.3598 CHEMBL4092847 |
| 85 train 5.0500 5.3195 0.2695 CHEMBL2333740 |
| 86 train 5.1000 5.3195 0.2195 CHEMBL2333739 |
| 87 train 5.9500 6.2773 0.3273 CHEMBL4074825 |
| 88 test 6.7000 5.6805 -1.0195 CHEMBL399878 |
| 89 test 6.5100 6.6958 0.1858 CHEMBL2347670 |
| 90 test 5.8600 6.1533 0.2933 CHEMBL4211316 |
| 91 train 5.5700 5.9452 0.3752 CHEMBL4206180 |
| 92 train 7.8500 6.9366 -0.9134 CHEMBL1221731 |
| 93 train 6.0000 6.6759 0.6759 CHEMBL2283181 |
| 94 test 7.6800 7.5174 -0.1626 CHEMBL1669033 |
| 95 train 7.1100 7.5737 0.4637 CHEMBL1669035 |
| 96 train 8.1000 6.4968 -1.6032 CHEMBL4084676 |
| 97 train 4.5000 5.7385 1.2385 CHEMBL179204 |
| 98 train 4.5000 5.7041 1.2041 CHEMBL2283168 |
| 99 train 7.5200 6.1683 -1.3517 CHEMBL2283154 |
| 100 train 5.7200 5.5090 -0.2110 CHEMBL1221677 |
| 101 test 6.9200 6.9689 0.0489 CHEMBL122 |
| 102 train 6.4000 6.1865 -0.2135 CHEMBL3127308 |
| 103 test 5.1000 5.8428 0.7428 CHEMBL1089958 |
| 104 train 5.0100 5.4758 0.4658 CHEMBL1939434 |
| 105 train 5.1200 5.3172 0.1972 CHEMBL1939435 |
| 106 train 6.2000 6.1871 -0.0129 CHEMBL2283150 |
| 107 train 6.7100 6.2163 -0.4937 CHEMBL4780951 |
| 108 train 5.7000 4.9609 -0.7391 CHEMBL266858 |
| 109 train 5.6800 5.3385 -0.3415 CHEMBL141113 |
| 110 train 8.0000 7.1739 -0.8261 CHEMBL148153 |
| 111 train 8.1000 6.9271 -1.1729 CHEMBL29839 |
| 112 train 6.8000 6.1000 -0.7000 CHEMBL400080 |
| 113 train 6.7200 7.0286 0.3086 CHEMBL118 |
| 114 train 4.8300 6.2933 1.4633 CHEMBL213267 |
| 115 test 5.6900 5.8958 0.2058 CHEMBL17161 |
| 116 test 6.5400 7.0286 0.4886 CHEMBL118 |
| 117 train 4.5000 6.0948 1.5948 CHEMBL1632406 |
| 118 test 6.9600 6.7546 -0.2054 CHEMBL19056 |
| 119 train 7.3700 6.8932 -0.4768 CHEMBL1288617 |
| 120 train 4.7300 7.4032 2.6732 CHEMBL1290434 |
| 121 test 7.8500 6.0048 -1.8452 CHEMBL104009 |
| 122 train 6.4700 7.8062 1.3362 CHEMBL52889 |
| 123 test 6.0000 5.7630 -0.2370 CHEMBL95479 |
| 124 train 4.4600 5.7109 1.2509 CHEMBL341298 |
| 125 train 7.4000 6.5008 -0.8992 CHEMBL330194 |
| 126 train 6.0200 5.7840 -0.2360 CHEMBL49011 |
| 127 test 4.2100 5.7885 1.5785 CHEMBL376583 |
| 128 test 6.3900 6.2304 -0.1596 CHEMBL6 |
| 129 test 7.0000 5.5035 -1.4965 CHEMBL521 |
| 130 train 6.5500 7.0286 0.4786 CHEMBL118 |
| 131 train 6.5100 5.5740 -0.9360 CHEMBL1242554 |
| 132 train 5.9200 5.8393 -0.0807 CHEMBL3265351 |
| 133 train 5.3600 5.4520 0.0920 CHEMBL3265355 |
| 134 train 5.1900 5.3691 0.1791 CHEMBL1242364 |
| 135 train 4.6000 6.0436 1.4436 CHEMBL1242459 |
| 136 train 4.2400 6.2868 2.0468 CHEMBL3265346 |
| 137 train 4.3200 5.3619 1.0419 CHEMBL224401 |
| 138 train 7.0500 5.4626 -1.5874 CHEMBL224400 |
| 139 test 4.8500 5.5838 0.7338 CHEMBL376143 |
| 140 train 6.0300 5.7157 -0.3143 CHEMBL1631308 |
| 141 train 4.3800 5.8499 1.4699 CHEMBL340717 |
| 142 train 4.7000 5.3141 0.6141 CHEMBL25 |
| 143 test 6.3200 6.3077 -0.0123 CHEMBL257103 |
| 144 test 6.3000 6.5189 0.2189 CHEMBL278231 |
| 145 train 7.4600 7.0286 -0.4314 CHEMBL118 |
| 146 train 6.0000 7.0286 1.0286 CHEMBL118 |
| 147 train 4.5600 5.5608 1.0008 CHEMBL2315854 |
| 148 test 5.6000 6.3455 0.7455 CHEMBL95659 |
| 149 train 6.8000 6.8327 0.0327 CHEMBL274893 |
| 150 test 6.4700 6.2644 -0.2056 CHEMBL300021 |
| 151 test 5.9800 5.8646 -0.1154 CHEMBL300687 |
| 152 train 6.7700 6.6925 -0.0775 CHEMBL126303 |
| 153 train 7.6400 6.9301 -0.7099 CHEMBL420628 |
| 154 test 5.3300 5.3195 -0.0105 CHEMBL2333755 |
| 155 train 5.1800 5.5357 0.3557 CHEMBL2333753 |
| 156 test 5.2400 6.0578 0.8178 CHEMBL323277 |
| 157 train 7.1000 7.3267 0.2267 CHEMBL295032 |
| 158 train 6.1200 6.4009 0.2809 CHEMBL29204 |
| 159 train 5.3400 5.7563 0.4163 CHEMBL568715 |
| 160 test 5.4600 6.0602 0.6002 CHEMBL568719 |
| 161 train 6.0500 5.7563 -0.2937 CHEMBL568723 |
| 162 train 5.6200 5.3141 -0.3059 CHEMBL25 |
| 163 train 5.3800 5.9591 0.5791 CHEMBL4799227 |
| 164 train 6.9200 7.0286 0.1086 CHEMBL118 |
| 165 train 6.9200 6.3920 -0.5280 CHEMBL4455511 |
| 166 train 6.6000 6.2847 -0.3153 CHEMBL273340 |
| 167 train 5.3300 6.3203 0.9903 CHEMBL2160146 |
| 168 train 7.3300 6.4937 -0.8363 CHEMBL4867950 |
| 169 train 7.8500 6.8835 -0.9665 CHEMBL282924 |
| 170 train 4.6800 6.6153 1.9353 CHEMBL268470 |
| 171 train 5.6600 5.1894 -0.4706 CHEMBL503071 |
| 172 train 5.2400 6.2304 0.9904 CHEMBL6 |
| 173 train 5.0700 4.8568 -0.2132 CHEMBL3400659 |
| 174 train 4.6700 5.4427 0.7727 CHEMBL2315016 |
| 175 test 5.9700 5.8988 -0.0712 CHEMBL3402597 |
| 176 train 6.4200 6.3862 -0.0338 CHEMBL18040 |
| 177 train 4.7100 4.9829 0.2729 CHEMBL517149 |
| 178 train 4.3300 4.8086 0.4786 CHEMBL465194 |
| 179 test 6.5700 5.7505 -0.8195 CHEMBL106255 |
| 180 train 6.0000 5.7505 -0.2495 CHEMBL106255 |
| 181 train 9.3500 6.9360 -2.4140 CHEMBL282093 |
| 182 train 4.7100 4.8644 0.1544 CHEMBL291501 |
| 183 test 4.7500 4.6092 -0.1408 CHEMBL471103 |
| 184 train 6.0900 4.2393 -1.8507 CHEMBL490482 |
| 185 train 4.6700 5.0488 0.3788 CHEMBL473518 |
| 186 train 7.2400 6.9689 -0.2711 CHEMBL122 |
| 187 train 8.4800 8.5008 0.0208 CHEMBL92107 |
| 188 train 8.7000 8.2542 -0.4458 CHEMBL329999 |
| 189 train 8.0500 6.5794 -1.4706 CHEMBL283178 |
| 190 train 8.5200 8.4766 -0.0434 CHEMBL54327 |
| 191 train 8.0000 7.8829 -0.1171 CHEMBL52760 |
| 192 train 7.5700 6.6570 -0.9130 CHEMBL89625 |
| 193 train 5.0100 5.7653 0.7553 CHEMBL69261 |
| 194 train 6.2200 6.7110 0.4910 CHEMBL51434 |
| 195 test 8.3300 6.5112 -1.8188 CHEMBL28881 |
| 196 train 6.3700 6.4797 0.1097 CHEMBL320926 |
| 197 train 6.8900 6.0514 -0.8386 CHEMBL42225 |
| 198 train 5.3000 5.4322 0.1322 CHEMBL145727 |
| 199 train 5.9200 6.2521 0.3321 CHEMBL596888 |
| 200 train 4.1100 5.2172 1.1072 CHEMBL1163237 |
| 201 test 6.2900 6.4872 0.1972 CHEMBL43957 |
| 202 train 6.0400 5.5663 -0.4737 CHEMBL1081855 |
| 203 train 5.5700 6.0087 0.4387 CHEMBL1081856 |
| 204 test 5.8000 5.7622 -0.0378 CHEMBL1079875 |
| 205 train 6.8000 5.8648 -0.9352 CHEMBL1079876 |
| 206 test 5.5700 6.1559 0.5859 CHEMBL1079877 |
| 207 test 6.1400 6.3819 0.2419 CHEMBL1078090 |
| 208 test 4.9200 6.5526 1.6326 CHEMBL1078376 |
| 209 train 5.8900 5.2071 -0.6829 CHEMBL5202074 |
| 210 train 7.1600 6.7040 -0.4560 CHEMBL347720 |
| 211 train 6.5200 5.8517 -0.6683 CHEMBL15039 |
| 212 train 6.1200 6.9689 0.8489 CHEMBL122 |
| 213 train 5.4000 6.4581 1.0581 CHEMBL100250 |
| 214 test 5.4700 5.6307 0.1607 CHEMBL122890 |
| 215 test 5.5400 5.3097 -0.2303 CHEMBL409627 |
| 216 train 6.8500 6.1191 -0.7309 CHEMBL276052 |
| 217 train 5.6800 6.2509 0.5709 CHEMBL2283165 |
| 218 train 6.8100 6.9311 0.1211 CHEMBL1814813 |
| 219 train 6.4700 6.9010 0.4310 CHEMBL287447 |
| 220 train 8.8200 8.5368 -0.2832 CHEMBL92102 |
| 221 train 5.6200 6.2761 0.6561 CHEMBL346697 |
| 222 test 8.0500 7.0628 -0.9872 CHEMBL118064 |
| 223 test 6.6200 6.6664 0.0464 CHEMBL298296 |
| 224 train 7.5200 6.2001 -1.3199 CHEMBL331278 |
| 225 test 8.7000 7.7143 -0.9857 CHEMBL111562 |
| 226 train 7.7700 7.1322 -0.6378 CHEMBL361472 |
| 227 train 5.6000 6.2668 0.6668 CHEMBL365033 |
| 228 train 5.3200 6.4003 1.0803 CHEMBL284914 |
| 229 test 7.4000 7.0286 -0.3714 CHEMBL118 |
| 230 train 4.3400 5.8274 1.4874 CHEMBL29075 |
| 231 train 4.7800 5.4444 0.6644 CHEMBL236433 |
| 232 train 6.5800 7.1772 0.5972 CHEMBL361494 |
| 233 train 5.7600 5.1248 -0.6352 CHEMBL482162 |
| 234 train 7.2200 6.1389 -1.0811 CHEMBL44244 |
| 235 train 6.9600 6.3547 -0.6053 CHEMBL109017 |
| 236 train 7.6800 8.3098 0.6298 CHEMBL300597 |
| 237 train 8.5200 8.6539 0.1339 CHEMBL558340 |
| 238 test 6.7500 6.0462 -0.7038 CHEMBL5279631 |
| 239 train 6.0400 6.0514 0.0114 CHEMBL5272130 |
| 240 train 7.0000 5.8149 -1.1851 CHEMBL5278506 |
| 241 train 6.4400 6.8200 0.3800 CHEMBL52454 |
| 242 test 7.6400 8.4807 0.8407 CHEMBL300601 |
| 243 test 5.3400 4.9517 -0.3883 CHEMBL270060 |
| 244 test 4.1400 4.6652 0.5252 CHEMBL464610 |
| 245 train 6.8200 6.6489 -0.1711 CHEMBL95572 |
| 246 train 5.2400 5.3195 0.0795 CHEMBL2333737 |
| 247 train 6.7700 6.4350 -0.3350 CHEMBL24874 |
| 248 train 7.8500 6.1132 -1.7368 CHEMBL42485 |
| 249 train 5.8200 6.7780 0.9580 CHEMBL94274 |
| 250 train 5.2500 6.2686 1.0186 CHEMBL3309824 |
| 251 train 5.6400 6.2564 0.6164 CHEMBL1689431 |
| 252 train 5.1700 5.4187 0.2487 CHEMBL2334136 |
| 253 test 7.0000 6.2628 -0.7372 CHEMBL374427 |
| 254 test 5.7000 6.4407 0.7407 CHEMBL1682231 |
| 255 train 7.4000 6.8024 -0.5976 CHEMBL107088 |
| 256 train 7.7000 7.1072 -0.5928 CHEMBL290192 |
| 257 train 6.5000 6.0376 -0.4624 CHEMBL104147 |
| 258 train 8.2200 6.5156 -1.7044 CHEMBL1288592 |
| 259 train 4.9100 5.6118 0.7018 CHEMBL386992 |
| 260 train 4.9100 5.2494 0.3394 CHEMBL1275941 |
| 261 train 6.9600 7.0286 0.0686 CHEMBL118 |
| 262 train 4.3900 5.8713 1.4813 CHEMBL274271 |
| 263 test 4.4500 5.8493 1.3993 CHEMBL129861 |
| 264 train 7.1000 5.9219 -1.1781 CHEMBL319306 |
| 265 train 7.5200 6.4185 -1.1015 CHEMBL229955 |
| 266 train 6.5000 6.0200 -0.4800 CHEMBL2283160 |
| 267 test 4.4400 5.6414 1.2014 CHEMBL407035 |
| 268 train 5.7000 5.6642 -0.0358 CHEMBL361848 |
| 269 train 5.4400 5.7041 0.2641 CHEMBL2283167 |
| 270 test 5.6200 6.9301 1.3101 CHEMBL420628 |
| 271 train 6.1700 6.2304 0.0604 CHEMBL6 |
| 272 train 4.5400 6.6047 2.0647 CHEMBL1630233 |
| 273 test 5.5900 6.1559 0.5659 CHEMBL1078091 |
| 274 train 5.0900 6.4018 1.3118 CHEMBL1078557 |
| 275 train 7.5200 6.2063 -1.3137 CHEMBL362093 |
| 276 train 6.4200 5.9360 -0.4840 CHEMBL183101 |
| 277 train 6.0300 6.0464 0.0164 CHEMBL184764 |
| 278 train 9.3600 7.3431 -2.0169 CHEMBL186632 |
| 279 train 4.0700 5.6796 1.6096 CHEMBL169 |
| 280 test 8.0500 8.1121 0.0621 CHEMBL111095 |
| 281 train 5.0800 6.4368 1.3568 CHEMBL45383 |
| 282 train 8.4000 7.5898 -0.8102 CHEMBL296384 |
| 283 train 8.7000 9.0577 0.3577 CHEMBL315585 |
| 284 train 8.4000 7.9414 -0.4586 CHEMBL90447 |
| 285 train 6.1400 6.5064 0.3664 CHEMBL327078 |
| 286 train 8.3000 8.3198 0.0198 CHEMBL443791 |
| 287 test 8.4000 7.5898 -0.8102 CHEMBL296384 |
| 288 train 4.4000 5.7109 1.3109 CHEMBL126418 |
| 289 train 6.5700 6.6271 0.0571 CHEMBL161590 |
| 290 test 7.5400 6.5961 -0.9439 CHEMBL287919 |
| 291 train 6.8400 6.3005 -0.5395 CHEMBL324957 |
| 292 test 5.9200 6.2304 0.3104 CHEMBL6 |
| 293 train 4.1900 6.6628 2.4728 CHEMBL129215 |
| 294 train 5.2400 6.4770 1.2370 CHEMBL289484 |
| 295 train 7.8000 6.5112 -1.2888 CHEMBL29439 |
| 296 test 7.1300 7.6609 0.5309 CHEMBL324275 |
| 297 train 5.4600 6.1662 0.7062 CHEMBL358372 |
| 298 train 6.7700 6.4842 -0.2858 CHEMBL296447 |
| 299 train 4.7000 5.4322 0.7322 CHEMBL144232 |
| 300 test 6.9200 6.1389 -0.7811 CHEMBL42409 |
| 301 train 6.3600 6.2582 -0.1018 CHEMBL108961 |
| 302 train 6.1700 6.9789 0.8089 CHEMBL127190 |
| 303 test 6.1900 5.7028 -0.4872 CHEMBL24429 |
| 304 test 7.2300 7.1396 -0.0904 CHEMBL3355608 |
| 305 train 5.5000 5.0844 -0.4156 CHEMBL16272 |
| 306 train 5.4000 5.2077 -0.1923 CHEMBL149335 |
| 307 test 5.5000 6.2170 0.7170 CHEMBL3427203 |
| 308 train 6.3600 5.6822 -0.6778 CHEMBL65793 |
| 309 train 7.1000 6.1549 -0.9451 CHEMBL107706 |
| 310 train 6.9200 6.0729 -0.8471 CHEMBL110822 |
| 311 train 6.4600 6.3891 -0.0709 CHEMBL108857 |
| 312 train 7.7000 6.9689 -0.7311 CHEMBL122 |
| 313 train 4.8200 4.9996 0.1796 CHEMBL279166 |
| 314 train 5.1600 5.8712 0.7112 CHEMBL357380 |
| 315 test 6.0200 6.3380 0.3180 CHEMBL295752 |
| 316 train 6.8700 8.3832 1.5132 CHEMBL89263 |
| 317 test 8.8200 8.7434 -0.0766 CHEMBL312822 |
| 318 train 6.3200 7.3414 1.0214 CHEMBL18264 |
| 319 train 7.6800 7.4781 -0.2019 CHEMBL405623 |
| 320 test 7.8200 6.9399 -0.8801 CHEMBL282085 |
| 321 train 4.8700 6.5276 1.6576 CHEMBL338097 |
| 322 train 6.7500 5.5897 -1.1603 CHEMBL347198 |
| 323 train 7.0500 7.1640 0.1140 CHEMBL290945 |
| 324 test 6.6600 7.1237 0.4637 CHEMBL111039 |
| 325 train 6.4000 6.3037 -0.0963 CHEMBL443278 |
| 326 train 5.8800 6.4766 0.5966 CHEMBL95021 |
| 327 train 8.2200 7.6718 -0.5482 CHEMBL363574 |
| 328 train 7.4900 7.4113 -0.0787 CHEMBL365603 |
| 329 train 6.2400 6.7680 0.5280 CHEMBL865 |
| 330 train 6.9600 6.4305 -0.5295 CHEMBL44516 |
| 331 train 6.1800 5.1772 -1.0028 CHEMBL70158 |
| 332 train 7.7000 6.7917 -0.9083 CHEMBL289561 |
| 333 test 7.8900 6.8104 -1.0796 CHEMBL155927 |
| 334 train 5.8100 6.1575 0.3475 CHEMBL71455 |
| 335 train 6.2900 6.2971 0.0071 CHEMBL71372 |
| 336 train 5.5400 5.5205 -0.0195 CHEMBL155781 |
| 337 train 6.2400 6.4710 0.2310 CHEMBL183294 |
| 338 train 4.8400 6.1953 1.3553 CHEMBL27733 |
| 339 train 5.1900 5.8855 0.6955 CHEMBL388756 |
| 340 test 7.2100 7.9414 0.7314 CHEMBL327900 |
| 341 train 6.1600 6.4881 0.3281 CHEMBL516680 |
| 342 train 6.9200 7.0286 0.1086 CHEMBL118 |
| 343 train 7.3000 5.9907 -1.3093 CHEMBL274990 |
| 344 train 7.0000 6.7141 -0.2859 CHEMBL7162 |
| 345 test 7.5200 7.0009 -0.5191 CHEMBL296662 |
| 346 train 6.9200 6.4275 -0.4925 CHEMBL95469 |
| 347 train 4.2700 5.2466 0.9766 CHEMBL1163243 |
| 348 train 5.4700 6.5584 1.0884 CHEMBL126244 |
| 349 train 8.5200 7.9890 -0.5310 CHEMBL185547 |
| 350 train 5.8300 6.6325 0.8025 CHEMBL158421 |
| 351 train 4.2000 6.4881 2.2881 CHEMBL29492 |
| 352 train 7.8900 8.5551 0.6651 CHEMBL418448 |
| 353 train 4.8400 6.1953 1.3553 CHEMBL27733 |
| 354 train 5.6400 6.5695 0.9295 CHEMBL159206 |
| 355 test 6.5200 5.7578 -0.7622 CHEMBL3113235 |
| 356 train 7.9000 5.6513 -2.2487 CHEMBL5283932 |
| 357 train 7.2500 6.5233 -0.7267 CHEMBL29533 |
| 358 train 6.5000 6.3862 -0.1138 CHEMBL18790 |
| 359 train 7.1600 6.7413 -0.4187 CHEMBL28599 |
| 360 test 8.0000 8.3455 0.3455 CHEMBL88550 |
| 361 train 4.0600 6.1003 2.0403 CHEMBL339221 |
| 362 train 8.0500 7.2143 -0.8357 CHEMBL97874 |
| 363 train 6.3600 5.7509 -0.6091 CHEMBL276976 |
| 364 test 6.0900 5.8820 -0.2080 CHEMBL222482 |
| 365 train 6.3500 5.7509 -0.5991 CHEMBL276976 |
| 366 train 7.4000 7.1769 -0.2231 CHEMBL289653 |
| 367 train 6.8500 6.7481 -0.1019 CHEMBL273815 |
| 368 train 6.3700 6.9689 0.5989 CHEMBL122 |
| 369 test 5.3000 5.2821 -0.0179 CHEMBL800 |
| 370 test 5.4000 6.3016 0.9016 CHEMBL91923 |
| 371 train 6.1400 5.2358 -0.9042 CHEMBL432782 |
| 372 train 6.5200 5.8790 -0.6410 CHEMBL158310 |
| 373 train 6.2700 7.0286 0.7586 CHEMBL118 |
| 374 train 4.4200 5.2372 0.8172 CHEMBL3289927 |
| 375 train 4.7100 5.1320 0.4220 CHEMBL3289931 |
| 376 test 4.8300 5.2286 0.3986 CHEMBL3289941 |
| 377 train 5.4900 6.2304 0.7404 CHEMBL6 |
| 378 test 5.7100 6.0915 0.3815 CHEMBL3309823 |
| 379 test 6.1700 6.9689 0.7989 CHEMBL122 |
| 380 test 7.4700 7.0026 -0.4674 CHEMBL524662 |
| 381 test 6.4000 6.2677 -0.1323 CHEMBL319825 |
| 382 train 6.0000 5.9922 -0.0078 CHEMBL153767 |
| 383 train 6.1600 5.8790 -0.2810 CHEMBL154480 |
| 384 train 4.7500 6.3361 1.5861 CHEMBL571852 |
| 385 train 5.3000 6.5800 1.2800 CHEMBL98903 |
| 386 train 6.1400 5.9527 -0.1873 CHEMBL282185 |
| 387 train 7.8900 7.9366 0.0466 CHEMBL118081 |
| 388 train 5.4100 6.1389 0.7289 CHEMBL44101 |
| 389 train 7.5200 6.6457 -0.8743 CHEMBL44152 |
| 390 train 5.1800 7.2009 2.0209 CHEMBL109486 |
| 391 test 8.2200 8.1200 -0.1000 CHEMBL52872 |
| 392 train 8.4000 7.1758 -1.2242 CHEMBL324509 |
| 393 test 6.2100 5.8780 -0.3320 CHEMBL156256 |
| 394 train 5.8200 5.7245 -0.0955 CHEMBL107600 |
| 395 train 6.5500 6.4842 -0.0658 CHEMBL296447 |
| 396 train 7.6800 7.2978 -0.3822 CHEMBL282839 |
| 397 train 6.1400 6.8427 0.7027 CHEMBL43331 |
| 398 train 6.4600 6.0259 -0.4341 CHEMBL416989 |
| 399 train 7.7200 8.1202 0.4002 CHEMBL52019 |
| 400 train 4.1900 5.7086 1.5186 CHEMBL497678 |
| 401 train 4.5200 5.7152 1.1952 CHEMBL355771 |
| 402 train 6.1900 6.3158 0.1258 CHEMBL319766 |
| 403 train 7.3000 6.4054 -0.8946 CHEMBL97179 |
| 404 train 5.9800 6.1099 0.1299 CHEMBL295068 |
| 405 train 8.0000 7.6605 -0.3395 CHEMBL111597 |
| 406 train 7.0000 6.0525 -0.9475 CHEMBL99933 |
| 407 train 8.9200 6.2200 -2.7000 CHEMBL91118 |
| 408 test 8.1500 6.3478 -1.8022 CHEMBL115752 |
| 409 test 7.7000 7.6539 -0.0461 CHEMBL117947 |
| 410 test 7.7200 7.4496 -0.2704 CHEMBL54039 |
| 411 train 8.2800 6.9567 -1.3233 CHEMBL280636 |
| 412 train 8.3000 7.5418 -0.7582 CHEMBL109623 |
| 413 train 6.1900 6.8994 0.7094 CHEMBL283388 |
| 414 train 5.5800 6.5516 0.9716 CHEMBL183977 |
| 415 train 5.9200 7.0286 1.1086 CHEMBL118 |
| 416 train 4.9300 5.0080 0.0780 CHEMBL1916948 |
| 417 train 5.0600 5.5870 0.5270 CHEMBL1916961 |
| 418 train 5.5800 5.3733 -0.2067 CHEMBL1916967 |
| 419 train 5.7000 5.4974 -0.2026 CHEMBL589812 |
| 420 test 5.8200 5.6495 -0.1705 CHEMBL70921 |
| 421 test 6.8500 5.8840 -0.9660 CHEMBL69998 |
| 422 train 7.1700 6.2903 -0.8797 CHEMBL94939 |
| 423 test 4.8400 4.9600 0.1200 CHEMBL1275921 |
| 424 train 6.6400 6.6607 0.0207 CHEMBL415895 |
| 425 test 4.7000 6.5285 1.8285 CHEMBL489899 |
| 426 train 6.4800 5.6605 -0.8195 CHEMBL157950 |
| 427 train 6.1700 6.9789 0.8089 CHEMBL127190 |
| 428 train 7.8200 7.1931 -0.6269 CHEMBL89578 |
| 429 train 6.2800 6.0100 -0.2700 CHEMBL109143 |
| 430 train 6.1900 6.4022 0.2122 CHEMBL157886 |
| 431 test 6.2200 5.8790 -0.3410 CHEMBL157720 |
| 432 train 6.4300 6.3460 -0.0840 CHEMBL155206 |
| 433 test 6.9600 6.4350 -0.5250 CHEMBL285828 |
| 434 train 6.3400 6.9474 0.6074 CHEMBL273420 |
| 435 train 8.0500 7.4535 -0.5965 CHEMBL328009 |
| 436 train 7.7500 7.6145 -0.1355 CHEMBL17075 |
| 437 train 6.9600 6.8555 -0.1045 CHEMBL16850 |
| 438 train 6.5700 5.3449 -1.2251 CHEMBL1917099 |
| 439 train 6.3000 5.7993 -0.5007 CHEMBL1917102 |
| 440 train 4.9500 6.4768 1.5268 CHEMBL743 |
| 441 train 6.7700 6.4350 -0.3350 CHEMBL279265 |
| 442 train 4.3500 6.0142 1.6642 CHEMBL1086757 |
| 443 test 4.0200 6.2249 2.2049 CHEMBL1076751 |
| 444 train 5.0800 5.4719 0.3919 CHEMBL2063855 |
| 445 train 6.0000 6.8453 0.8453 CHEMBL43461 |
| 446 train 5.5800 5.6580 0.0780 CHEMBL357262 |
| 447 test 6.0100 4.9912 -1.0188 CHEMBL356596 |
| 448 train 5.8700 5.5035 -0.3665 CHEMBL521 |
| 449 train 6.9400 6.1265 -0.8135 CHEMBL561888 |
| 450 train 8.1000 7.6911 -0.4089 CHEMBL551829 |
| 451 test 7.4000 7.0286 -0.3714 CHEMBL118 |
| 452 test 6.5700 6.4350 -0.1350 CHEMBL281847 |
| 453 train 9.2700 7.3560 -1.9140 CHEMBL500674 |
| 454 test 8.2900 6.3043 -1.9857 CHEMBL499347 |
| 455 train 10.7000 7.8567 -2.8433 CHEMBL525247 |
| 456 train 8.0000 6.7759 -1.2241 CHEMBL525020 |
| 457 train 8.8400 7.8790 -0.9610 CHEMBL502556 |
| 458 test 6.0000 6.2589 0.2589 CHEMBL49114 |
| 459 train 7.1200 7.0289 -0.0911 CHEMBL321182 |
| 460 train 4.2900 6.2438 1.9538 CHEMBL148691 |
| 461 train 4.1900 5.7109 1.5209 CHEMBL419777 |
| 462 train 4.6300 5.5062 0.8762 CHEMBL139 |
| 463 test 5.0300 6.0204 0.9904 CHEMBL1629743 |
| 464 train 6.1000 6.2757 0.1757 CHEMBL70588 |
| 465 test 7.6800 7.2102 -0.4698 CHEMBL411894 |
| 466 train 6.3400 6.9474 0.6074 CHEMBL273420 |
| 467 train 7.7000 7.2233 -0.4767 CHEMBL329919 |
| 468 test 7.1600 6.7419 -0.4181 CHEMBL1630230 |
| 469 train 6.2800 6.7777 0.4977 CHEMBL16797 |
| 470 train 6.5200 6.3402 -0.1798 CHEMBL96057 |
| 471 train 7.5200 7.5097 -0.0103 CHEMBL322949 |
| 472 train 8.0500 8.1121 0.0621 CHEMBL111095 |
| 473 train 7.4000 6.9969 -0.4031 CHEMBL316455 |
| 474 train 8.0500 7.4535 -0.5965 CHEMBL328009 |
| 475 test 7.8900 7.4644 -0.4256 CHEMBL319512 |
| 476 train 7.5200 6.9047 -0.6153 CHEMBL100422 |
| 477 train 5.0000 6.2094 1.2094 CHEMBL166156 |
| 478 train 6.0000 6.4424 0.4424 CHEMBL347705 |
| 479 train 7.2700 7.0286 -0.2414 CHEMBL118 |
| 480 test 8.0000 6.9230 -1.0770 CHEMBL144728 |
| 481 train 6.0000 7.1385 1.1385 CHEMBL37371 |
| 482 train 4.1800 5.6922 1.5122 CHEMBL146920 |
| 483 train 6.6800 6.6972 0.0172 CHEMBL279249 |
| 484 train 7.2200 6.1132 -1.1068 CHEMBL42485 |
| 485 train 5.4000 5.8278 0.4278 CHEMBL149134 |
| 486 train 5.3300 5.4631 0.1331 CHEMBL305505 |
| 487 test 7.5100 6.9010 -0.6090 CHEMBL27975 |
| 488 train 6.3000 6.3037 0.0037 CHEMBL111904 |
| 489 test 6.0700 6.8250 0.7550 CHEMBL28801 |
| 490 test 4.5800 4.8854 0.3054 CHEMBL277515 |
| 491 train 7.4400 7.0286 -0.4114 CHEMBL118 |
| 492 test 6.3600 6.2582 -0.1018 CHEMBL108961 |
| 493 train 6.0800 6.9428 0.8628 CHEMBL282838 |
| 494 train 8.2200 7.1108 -1.1092 CHEMBL52402 |
| 495 train 7.3000 5.8790 -1.4210 CHEMBL440001 |
| 496 train 6.5200 6.9689 0.4489 CHEMBL122 |
| 497 train 6.3200 6.9414 0.6214 CHEMBL289262 |
| 498 train 6.2600 6.0499 -0.2101 CHEMBL320273 |
| 499 train 5.1900 4.9909 -0.1991 CHEMBL3099221 |
| 500 train 7.3000 6.6202 -0.6798 CHEMBL151042 |
| 501 test 7.5800 5.1365 -2.4435 CHEMBL571 |
| 502 train 7.1600 7.0286 -0.1314 CHEMBL118 |
| 503 test 4.9600 6.5166 1.5566 CHEMBL101503 |
| 504 train 6.4800 5.6794 -0.8006 CHEMBL107938 |
| 505 test 8.3000 7.0769 -1.2231 CHEMBL76692 |
| 506 train 6.1700 6.3426 0.1726 CHEMBL323267 |
| 507 train 6.8500 6.7675 -0.0825 CHEMBL41405 |
| 508 train 8.0000 6.6266 -1.3734 CHEMBL1288533 |
| 509 train 8.1500 6.7091 -1.4409 CHEMBL1630251 |
| 510 test 6.1600 5.9219 -0.2381 CHEMBL319072 |
| 511 train 8.0000 6.7139 -1.2861 CHEMBL45192 |
| 512 test 6.3400 6.6061 0.2661 CHEMBL43089 |
| 513 train 7.2400 7.0286 -0.2114 CHEMBL118 |
| 514 train 7.1000 6.0658 -1.0342 CHEMBL350039 |
| 515 train 7.7000 5.8880 -1.8120 CHEMBL76376 |
| 516 train 6.3700 6.4797 0.1097 CHEMBL320926 |
| 517 train 8.2200 8.5463 0.3263 CHEMBL57837 |
| 518 train 7.8200 5.9219 -1.8981 CHEMBL328837 |
| 519 test 6.4900 6.4368 -0.0532 CHEMBL43933 |
| 520 test 7.2900 7.5054 0.2154 CHEMBL111657 |
| 521 train 4.2400 6.7594 2.5194 CHEMBL170780 |
| 522 test 6.1900 5.6101 -0.5799 CHEMBL496 |
| 523 train 6.0700 6.1461 0.0761 CHEMBL295640 |
| 524 train 6.1800 6.7934 0.6134 CHEMBL289447 |
| 525 train 5.0200 5.0101 -0.0099 CHEMBL3264687 |
| 526 train 4.1900 5.7992 1.6092 CHEMBL283425 |
| 527 train 6.3000 5.1042 -1.1958 CHEMBL3265358 |
| 528 train 7.3700 6.5245 -0.8455 CHEMBL3355603 |
| 529 train 5.1200 4.5665 -0.5535 CHEMBL1173685 |
| 530 train 5.8300 6.6266 0.7966 CHEMBL1630234 |
| 531 train 5.7000 6.9206 1.2206 CHEMBL1630238 |
| 532 test 4.6700 6.7091 2.0391 CHEMBL1630243 |
| 533 test 4.2100 4.9918 0.7818 CHEMBL5430086 |
| 534 test 5.2000 5.6922 0.4922 CHEMBL343865 |
| 535 train 9.6000 7.6911 -1.9089 CHEMBL551829 |
| 536 train 6.4700 7.0286 0.5586 CHEMBL118 |
| 537 train 6.5800 6.9689 0.3889 CHEMBL122 |
| 538 train 7.6400 6.3285 -1.3115 CHEMBL558230 |
| 539 train 6.6800 6.2206 -0.4594 CHEMBL70478 |
| 540 test 6.9200 6.9984 0.0784 CHEMBL283038 |
| 541 test 5.0800 6.6630 1.5830 CHEMBL285831 |
| 542 train 5.2800 6.3014 1.0214 CHEMBL73997 |
| 543 train 7.0000 6.5024 -0.4976 CHEMBL24957 |
| 544 train 6.5500 5.8824 -0.6676 CHEMBL2283148 |
| 545 train 6.9600 6.7698 -0.1902 CHEMBL2283180 |
| 546 train 7.5200 7.7397 0.2197 CHEMBL2283175 |
| 547 train 7.1800 8.0107 0.8307 CHEMBL1669039 |
| 548 train 4.4400 5.5280 1.0880 CHEMBL1814716 |
| 549 train 8.2900 7.5994 -0.6906 CHEMBL271932 |
| 550 train 6.5200 6.9041 0.3841 CHEMBL259678 |
| 551 train 6.8400 7.0658 0.2258 CHEMBL408216 |
| 552 train 7.6200 7.5270 -0.0930 CHEMBL408788 |
| 553 train 7.9600 7.7020 -0.2580 CHEMBL270305 |
| 554 train 6.6700 7.0570 0.3870 CHEMBL403827 |
| 555 train 6.2000 6.5222 0.3222 CHEMBL257300 |
| 556 test 5.7200 7.1615 1.4415 CHEMBL259469 |
| 557 test 6.1400 6.5934 0.4534 CHEMBL257491 |
| 558 train 6.0900 6.1615 0.0715 CHEMBL408897 |
| 559 train 4.0000 5.0113 1.0113 CHEMBL464006 |
| 560 train 7.5700 5.5333 -2.0367 CHEMBL414883 |
| 561 train 7.8000 6.6958 -1.1042 CHEMBL148708 |
| 562 train 7.1700 7.0286 -0.1414 CHEMBL118 |
| 563 test 9.5500 7.4437 -2.1063 CHEMBL551148 |
| 564 train 5.8200 6.3020 0.4820 CHEMBL286490 |
| 565 test 4.7100 6.4231 1.7131 CHEMBL35685 |
| 566 train 5.9200 7.0286 1.1086 CHEMBL118 |
| 567 test 6.5000 6.4350 -0.0650 CHEMBL25371 |
| 568 train 6.9600 6.5943 -0.3657 CHEMBL24798 |
| 569 test 7.5500 6.0286 -1.5214 CHEMBL407109 |
| 570 train 7.1900 6.2734 -0.9166 CHEMBL369492 |
| 571 test 6.3600 6.3455 -0.0145 CHEMBL26509 |
| 572 train 7.0300 7.1080 0.0780 CHEMBL271103 |
| 573 train 8.0100 6.7104 -1.2996 CHEMBL271104 |
| 574 train 7.3200 7.4339 0.1139 CHEMBL270510 |
| 575 train 8.3900 6.6760 -1.7140 CHEMBL270294 |
| 576 train 6.2800 6.1826 -0.0974 CHEMBL271312 |
| 577 train 7.5400 6.4906 -1.0494 CHEMBL270730 |
| 578 train 5.8300 5.9350 0.1050 CHEMBL270111 |
| 579 train 6.5300 6.4200 -0.1100 CHEMBL271763 |
| 580 train 7.3300 7.0434 -0.2866 CHEMBL272627 |
| 581 train 7.4300 8.0917 0.6617 CHEMBL257108 |
| 582 test 7.3100 7.5270 0.2170 CHEMBL269832 |
| 583 test 8.9200 7.0658 -1.8542 CHEMBL272433 |
| 584 test 7.9300 6.6240 -1.3060 CHEMBL269818 |
| 585 train 5.2400 6.9442 1.7042 CHEMBL272605 |
| 586 train 5.8900 5.0825 -0.8075 CHEMBL3331343 |
| 587 test 5.3300 5.4631 0.1331 CHEMBL305505 |
| 588 test 4.1000 4.9829 0.8829 CHEMBL480462 |
| 589 train 8.8400 7.8790 -0.9610 CHEMBL502556 |
| 590 test 4.3500 5.7086 1.3586 CHEMBL498529 |
| 591 train 5.7700 6.6977 0.9277 CHEMBL3290202 |
| 592 train 9.8500 6.2304 -3.6196 CHEMBL6 |
| 593 train 6.8400 6.6697 -0.1703 CHEMBL524304 |
| 594 train 6.8400 6.6697 -0.1703 CHEMBL524304 |
| 595 train 5.6200 5.0630 -0.5570 CHEMBL3087872 |
| 596 train 5.5600 5.2257 -0.3343 CHEMBL3087873 |
| 597 train 5.5700 5.1552 -0.4148 CHEMBL3087875 |
| 598 test 5.4000 7.2798 1.8798 CHEMBL410524 |
| 599 train 6.5400 6.9689 0.4289 CHEMBL122 |
| 600 train 5.7200 6.5880 0.8680 CHEMBL406528 |
| 601 test 6.6800 6.9689 0.2889 CHEMBL122 |
| 602 train 6.5300 6.3616 -0.1684 CHEMBL273118 |
| 603 train 5.5500 6.9125 1.3625 CHEMBL409468 |
| 604 train 5.4800 6.5880 1.1080 CHEMBL406528 |
| 605 test 7.2900 7.2404 -0.0496 CHEMBL408215 |
| 606 train 7.4700 7.4580 -0.0120 CHEMBL257677 |
| 607 train 7.6500 7.4592 -0.1908 CHEMBL257678 |
| 608 test 7.3500 8.0538 0.7038 CHEMBL257299 |
| 609 train 7.0400 7.5270 0.4870 CHEMBL272239 |
| 610 train 7.1100 6.8785 -0.2315 CHEMBL405841 |
| 611 train 6.2000 6.5222 0.3222 CHEMBL257300 |
| 612 train 5.0500 4.7124 -0.3376 CHEMBL1173450 |
| 613 train 4.8200 4.7284 -0.0916 CHEMBL517334 |
| 614 test 8.6000 8.4042 -0.1958 CHEMBL88549 |
| 615 train 4.4100 5.8967 1.4867 CHEMBL96842 |
| 616 train 5.5500 6.1397 0.5897 CHEMBL110145 |
| 617 train 7.4200 7.2925 -0.1275 CHEMBL17101 |
| 618 train 6.0000 7.0286 1.0286 CHEMBL118 |
| 619 test 6.3300 6.1172 -0.2128 CHEMBL421417 |
| 620 train 8.4000 8.2145 -0.1855 CHEMBL54370 |
| 621 train 7.3100 6.6669 -0.6431 CHEMBL282301 |
| 622 train 6.7000 6.5225 -0.1775 CHEMBL285335 |
| 623 test 4.4700 5.7883 1.3183 CHEMBL144658 |
| 624 train 5.7000 5.2494 -0.4506 CHEMBL19286 |
| 625 test 6.8100 7.4259 0.6159 CHEMBL117862 |
| 626 train 7.3000 6.5553 -0.7447 CHEMBL277115 |
| 627 train 5.9600 6.1987 0.2387 CHEMBL237208 |
| 628 test 5.2400 6.2442 1.0042 CHEMBL237400 |
| 629 test 5.3900 6.0440 0.6540 CHEMBL237399 |
| 630 train 5.4600 5.4667 0.0067 CHEMBL237204 |
| 631 test 7.1000 6.5658 -0.5342 CHEMBL42085 |
| 632 train 7.8500 6.5919 -1.2581 CHEMBL4465808 |
| 633 train 7.8500 6.5245 -1.3255 CHEMBL418859 |
| 634 test 5.0500 6.8410 1.7910 CHEMBL491477 |
| 635 train 6.3600 6.0296 -0.3304 CHEMBL108452 |
| 636 train 8.6600 7.0286 -1.6314 CHEMBL118 |
| 637 test 5.0100 6.2515 1.2416 CHEMBL127267 |
| 638 train 5.6000 5.7826 0.1826 CHEMBL2171253 |
| 639 train 8.3000 6.7680 -1.5320 CHEMBL865 |
| 640 train 5.3000 5.3905 0.0905 CHEMBL151658 |
| 641 train 5.7000 7.0202 1.3202 CHEMBL2283149 |
| 642 train 6.9200 6.8555 -0.0645 CHEMBL274473 |
| 643 test 7.4000 6.9086 -0.4914 CHEMBL43737 |
| 644 train 6.1800 6.4447 0.2647 CHEMBL416250 |
| 645 train 9.0000 8.7391 -0.2609 CHEMBL88717 |
| 646 test 6.8200 6.7253 -0.0947 CHEMBL42651 |
| 647 test 7.7000 6.9163 -0.7837 CHEMBL350422 |
| 648 train 5.6200 6.2304 0.6104 CHEMBL6 |
| 649 train 6.0500 6.0421 -0.0079 CHEMBL29562 |
| 650 train 5.3700 6.2167 0.8467 CHEMBL285975 |
| 651 train 6.2400 5.6033 -0.6367 CHEMBL433892 |
| 652 test 4.9600 6.7675 1.8075 CHEMBL434014 |
| 653 train 7.3300 5.9813 -1.3487 CHEMBL17229 |
| 654 train 6.6600 6.9665 0.3065 CHEMBL41739 |
| 655 train 7.6200 6.9665 -0.6535 CHEMBL281694 |
| 656 test 6.5500 6.5024 -0.0476 CHEMBL27784 |
| 657 train 7.2800 6.3222 -0.9578 CHEMBL283633 |
| 658 train 6.5400 6.5450 0.0050 CHEMBL29942 |
| 659 train 8.1700 6.9271 -1.2429 CHEMBL29583 |
| 660 train 7.2500 6.4985 -0.7515 CHEMBL283497 |
| 661 train 6.0500 6.5104 0.4604 CHEMBL436494 |
| 662 test 6.0400 6.3152 0.2752 CHEMBL373514 |
| 663 test 4.5300 6.2304 1.7004 CHEMBL6 |
| 664 test 5.6600 6.7141 1.0541 CHEMBL7162 |
| 665 train 7.1600 6.9136 -0.2464 CHEMBL290031 |
| 666 test 6.5200 7.3760 0.8560 CHEMBL3238415 |
| 667 train 5.2300 5.7121 0.4821 CHEMBL3234234 |
| 668 train 7.8900 8.5551 0.6651 CHEMBL418448 |
| 669 train 6.5500 6.2625 -0.2875 CHEMBL116253 |
| 670 train 6.0600 7.0286 0.9686 CHEMBL118 |
| 671 test 5.1200 5.1698 0.0498 CHEMBL1171257 |
| 672 train 4.8400 5.5711 0.7311 CHEMBL1210073 |
| 673 train 6.3000 6.2304 -0.0696 CHEMBL6 |
| 674 test 5.5500 6.2837 0.7337 CHEMBL5272219 |
| 675 train 5.9600 5.5062 -0.4538 CHEMBL139 |
| 676 train 4.5000 5.5533 1.0533 CHEMBL5271448 |
| 677 test 7.1600 7.0286 -0.1314 CHEMBL118 |
| 678 test 6.7700 5.7784 -0.9916 CHEMBL5287285 |
| 679 test 5.7800 6.5768 0.7968 CHEMBL5288533 |
| 680 train 5.0000 5.2326 0.2326 CHEMBL5270978 |
| 681 train 7.4000 7.0286 -0.3714 CHEMBL118 |
| 682 train 7.7500 7.6902 -0.0598 CHEMBL272862 |
| 683 test 7.3100 7.5270 0.2170 CHEMBL269832 |
| 684 test 7.0400 7.5270 0.4870 CHEMBL272239 |
| 685 train 7.9300 6.6240 -1.3060 CHEMBL269818 |
| 686 train 6.5200 6.4402 -0.0798 CHEMBL4062140 |
| 687 train 5.7400 5.3102 -0.4298 CHEMBL4067108 |
| 688 test 5.1800 5.5319 0.3519 CHEMBL4077764 |
| 689 train 5.3500 5.4231 0.0731 CHEMBL4064047 |
| 690 train 5.8900 6.0203 0.1303 CHEMBL4077191 |
| 691 train 5.4500 5.3694 -0.0806 CHEMBL3264694 |
| 692 test 5.6200 5.0740 -0.5460 CHEMBL3264699 |
| 693 train 5.3000 5.3406 0.0406 CHEMBL3264704 |
| 694 train 5.4800 5.8595 0.3795 CHEMBL1210074 |
| 695 train 5.6200 5.3141 -0.3059 CHEMBL25 |
| 696 train 5.3900 5.4719 0.0819 CHEMBL2063852 |
| 697 train 7.6400 6.8489 -0.7911 CHEMBL275601 |
| 698 train 5.9600 5.7564 -0.2036 CHEMBL323954 |
| 699 train 7.7000 6.9689 -0.7311 CHEMBL122 |
| 700 train 5.9700 5.6074 -0.3626 CHEMBL563 |
